# Supplementary material for: Structural basis for the homotypic fusion of chlamydial inclusions by the SNARE-like protein IncA
Source: PubMed Central journal article supplement (PMC6588587; doi:10.1038/s41467-019-10806-9), 2019-06-21
Supplement: 41467_2019_10806_MOESM1_ESM.pdf [file 41467_2019_10806_MOESM1_ESM.pdf]

## SUPPLEMENTARY INFORMATION

### **Structural basis for the homotypic fusion of chlamydial inclusions by the SNARE-like protein IncA**

Cingolani, G. et al.

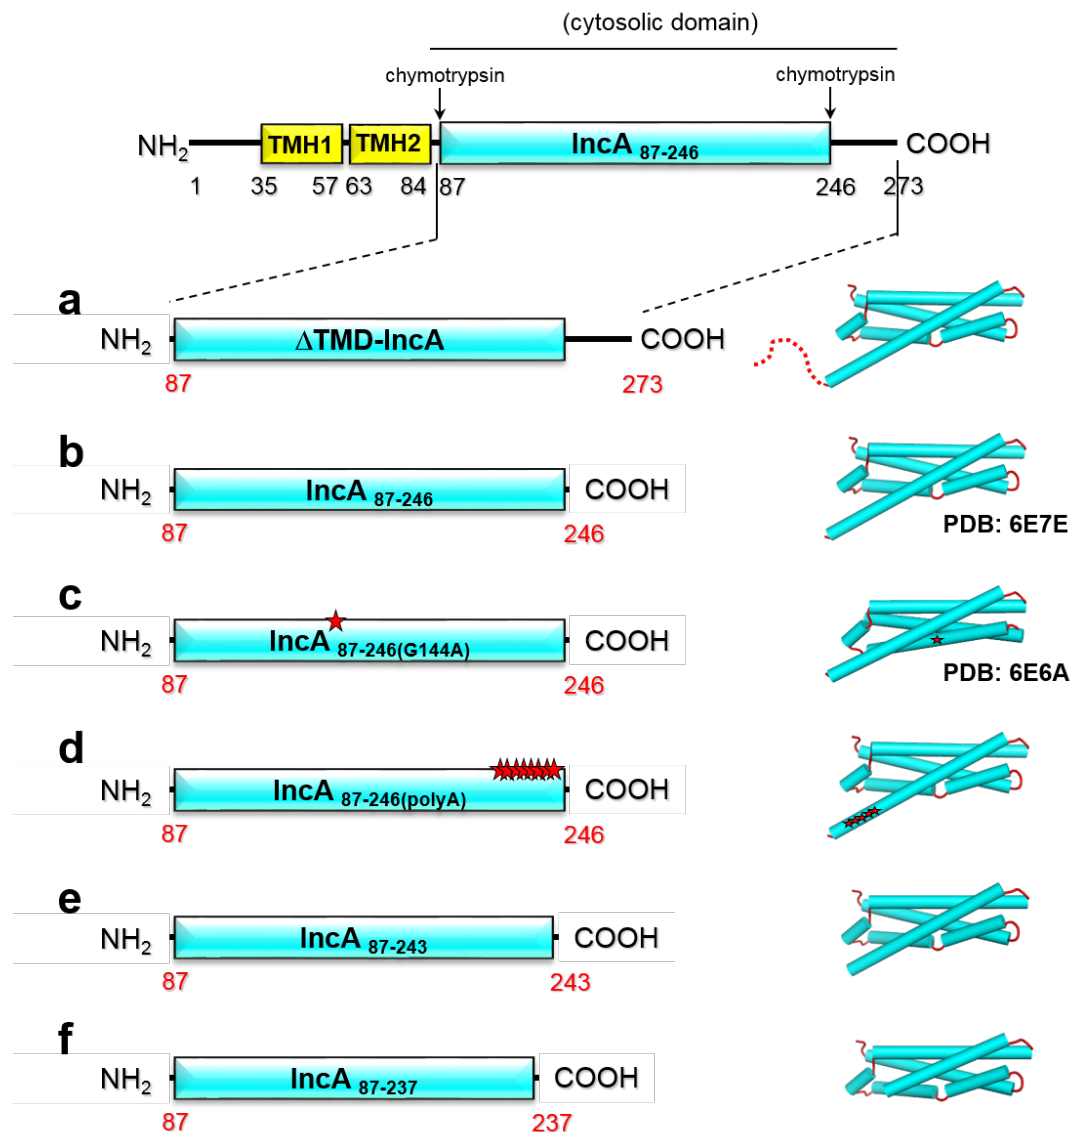

**Supplementary Figure 1. Schematic diagram of IncA<sub>WT</sub> and soluble IncA<sub>mutant</sub> constructs used in this study.** The crystal structures of IncA soluble fragments determined experimentally are denoted by a PDB ID. (a) depicts  $\Delta$ TMD-IncA in which the transmembrane domain was removed, thus creating soluble IncA; (b) depicts IncA<sub>87-246</sub>, which was crystallized (PDB: 6E7E); (c) depicts IncA<sub>87-246(G144A)</sub>, which was crystallized (PDB: 6E6A); (d) depicts IncA<sub>87-246(polyA)</sub> in which 8 residues were mutated to alanines; (e) depicts IncA<sub>87-243</sub>, and (f) depicts IncA<sub>87-237</sub>.

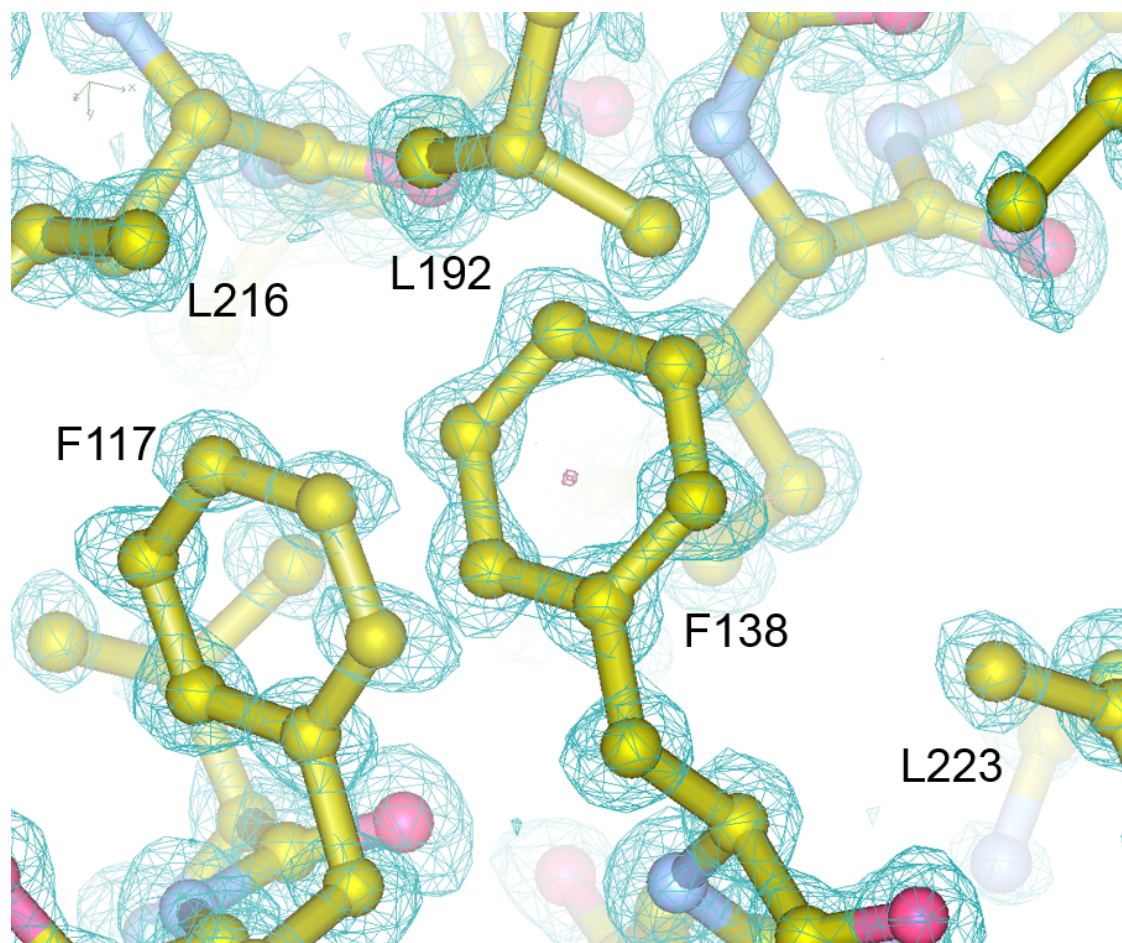

**Supplementary Figure 2. Magnified view of IncaA<sub>87-246</sub> final 2Fo-Fc electron density map** calculated at 1.12 Å resolution and overlaid to the final atomic model (shown as sticks). The electron density is colored in cyan and contoured at 1.9  $\sigma$  above background. The figure was generated using Coot<sup>1</sup>.

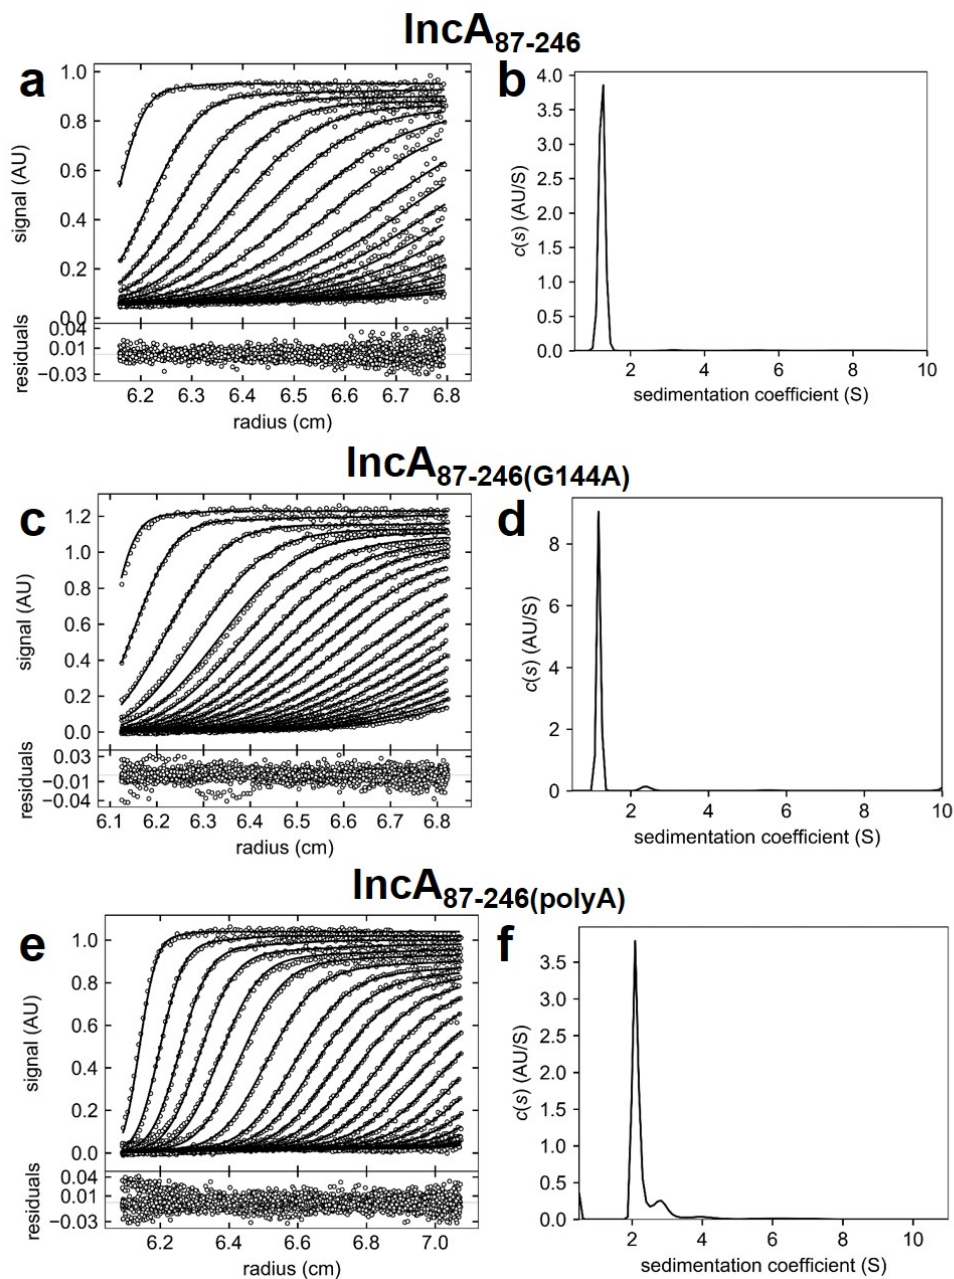

**Supplementary Figure 3: Analytical Ultracentrifugation Sedimentation Velocity (AUC-SV).** Panels (a), (c) and (e) show the position of the sedimentation boundary during AUC-SV analysis for InCA<sub>87-246</sub>, InCA<sub>87-246(G144A)</sub> and InCA<sub>87-246(polyA)</sub>, respectively. InCA<sub>87-246</sub> and InCA<sub>87-246(polyA)</sub> were analyzed at  $\sim 3.0 \text{ mg ml}^{-1}$  and InCA<sub>87-246(G144A)</sub> was at  $\sim 1.5 \text{ mg ml}^{-1}$ . In all three cases, the sedimentation boundary exhibits monophasic behavior, which is indicative of a single major component in solution, migrating with apparent sedimentation coefficients of 1.240S (b), 1.178S (e) and 2.131S (f). Conversion of the distribution of the apparent sedimentation coefficient to molecular mass revealed a M.W. of  $\sim 19.3 \text{ kDa}$  (InCA<sub>87-246</sub>),  $\sim 19.3 \text{ kDa}$  (InCA<sub>87-246(G144A)</sub>) and  $\sim 58.4 \text{ kDa}$  (InCA<sub>87-246(polyA)</sub>) (Supplementary Table 1).

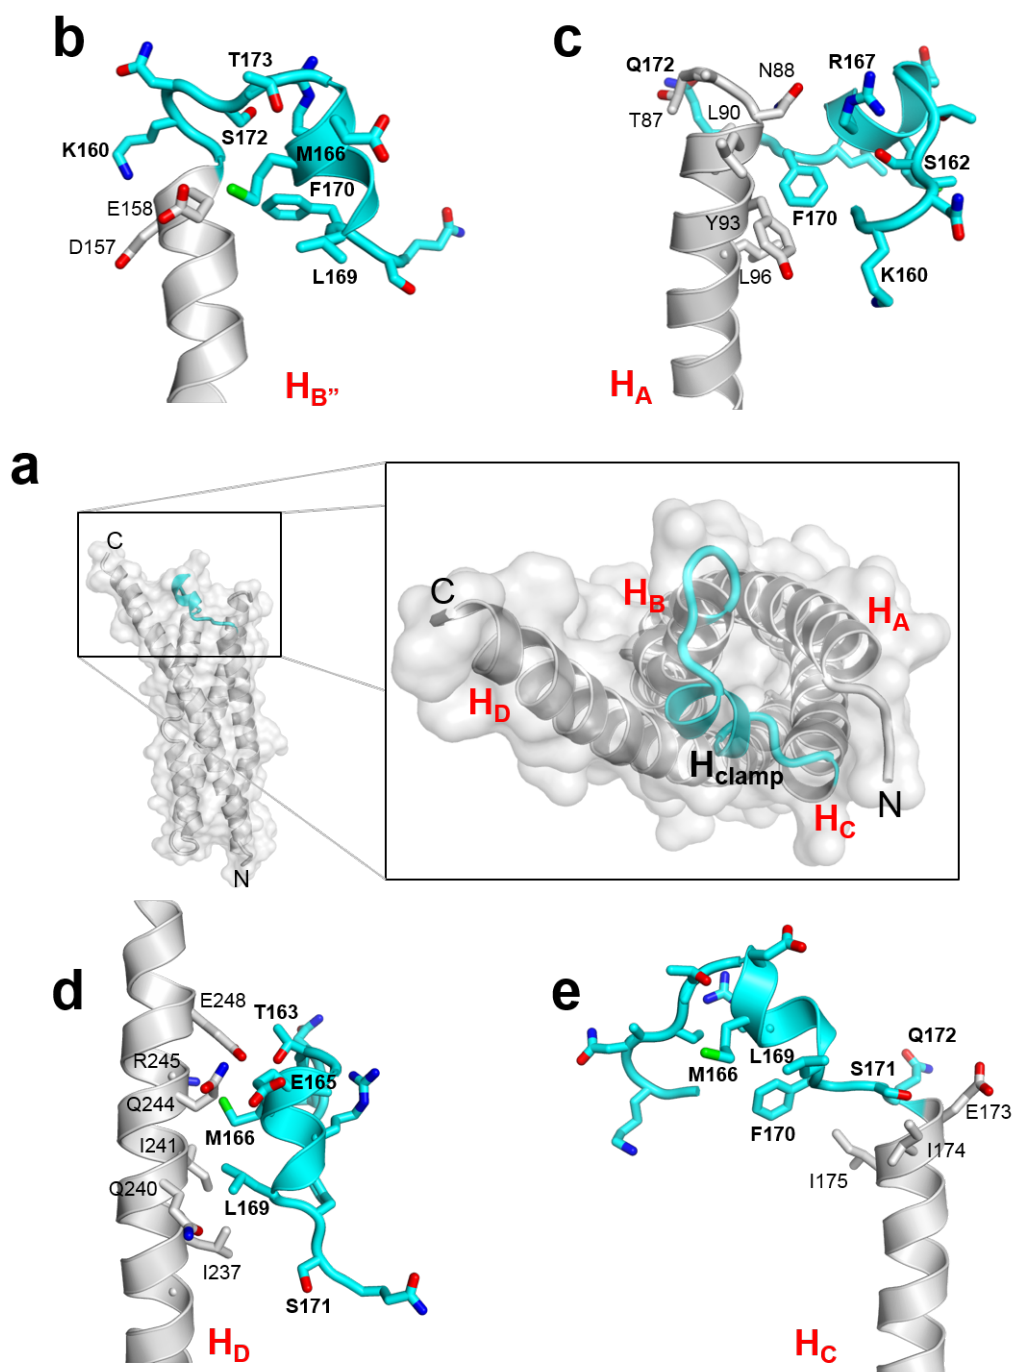

**Supplementary Figure 4. Identification of the contacts made by H<sub>clamp</sub> and the  $\alpha$ -helices H<sub>B''</sub>, H<sub>A</sub>, H<sub>D</sub>, and H<sub>C</sub>.** Central panel (a) shows side and top views of IncA<sub>87-246</sub> with H<sub>clamp</sub> colored in cyan and the rest of IncA in light gray. The ribbon diagram is overlaid to a semitransparent solvent surface. Panels (b) through (e) show magnified views of the individual contacts that the clamp makes with helices H<sub>B''</sub> (b), H<sub>A</sub> (c), H<sub>D</sub> (d), and H<sub>C</sub> (e). **Supplementary Table 2** lists the number of contacts and overall energetics of binding.



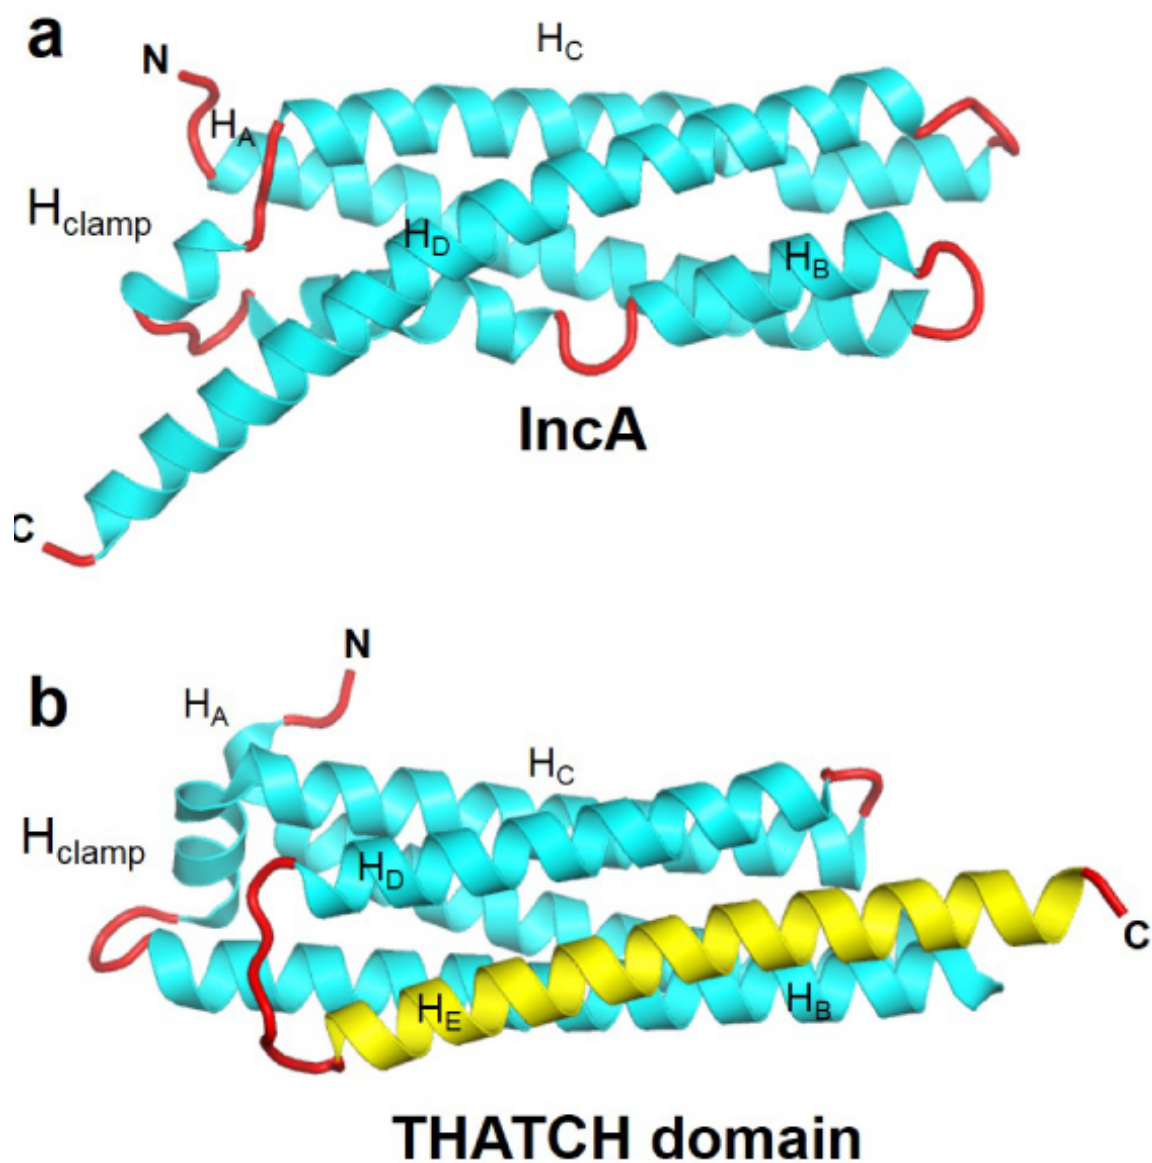

**Supplementary Figure 5. Ribbon diagrams of (a) IncA<sub>87-246</sub> and (b) HIP1R thatch domain core (PDB id 1R0D).** The two crystallographic models were refined to a resolution of 1.12 Å and 1.75 Å, respectively. In both panels, the non-canonical four-helix bundle formed by helices H<sub>A</sub>-H<sub>D</sub> and H<sub>clamp</sub> is colored in cyan and red while HIP1R fifth helix, H<sub>E</sub>, is in yellow (see panel **b**). The two four-helix bundles superimpose with an RMSD ~ 2.11 Å, while the overall C $\alpha$  RMSD is ~3.60 Å.

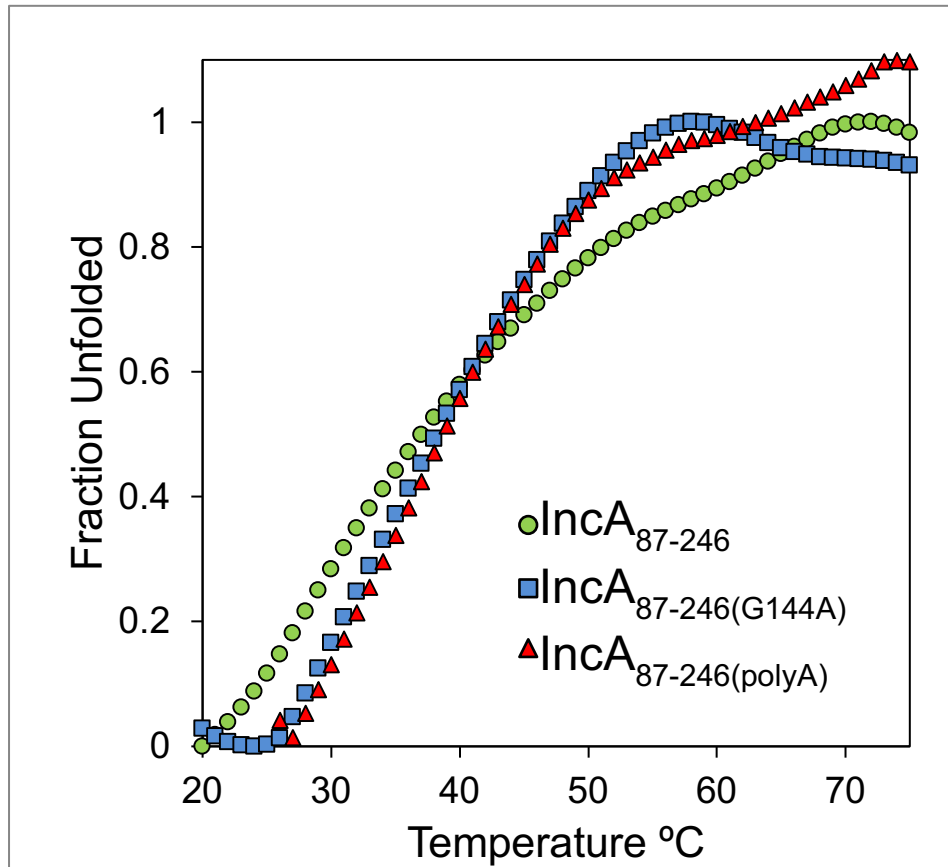

**Supplementary Figure 6. InCA<sub>87-246</sub>, InCA<sub>87-246</sub>(G144A), and InCA<sub>87-246</sub>(polyA) have comparable structural stability.** For each construct, the fraction unfolded was estimated by measuring changes in the ellipticity intensity at 220 nm as a function of temperature. The apparent Melting Temperature (*appT<sub>m</sub>*) values for InCA<sub>87-246</sub>, InCA<sub>87-246</sub>(G144A), and InCA<sub>87-246</sub>(polyA) are 38, 38.5 and 38.5 °C, respectively.

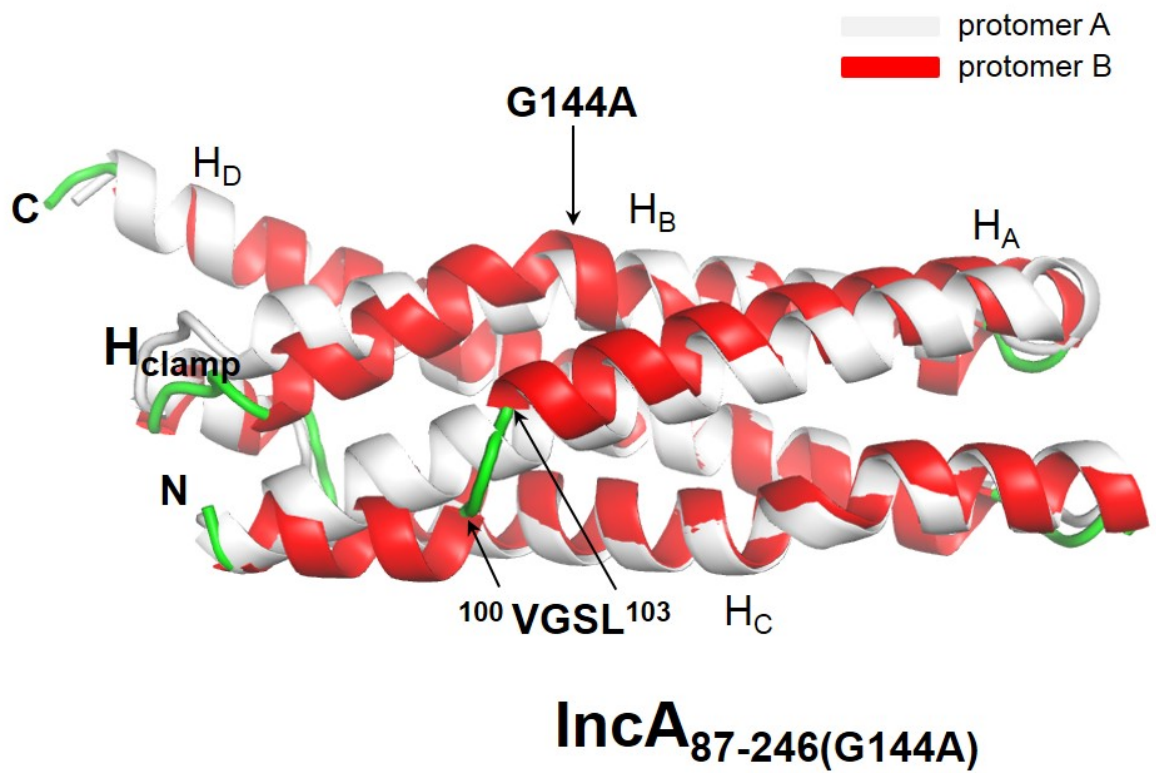

**Supplementary Figure 7. Secondary structure superimposition of the two IncA<sub>87-246</sub>(G144A) protomers found in the triclinic unit cell.** Protomer A is colored in gray, while protomer B is in red and green. The main structural differences are found in residues <sup>100</sup>VGSL<sup>103</sup> of protomer B, at the base of helix A, as detailed in the main text.



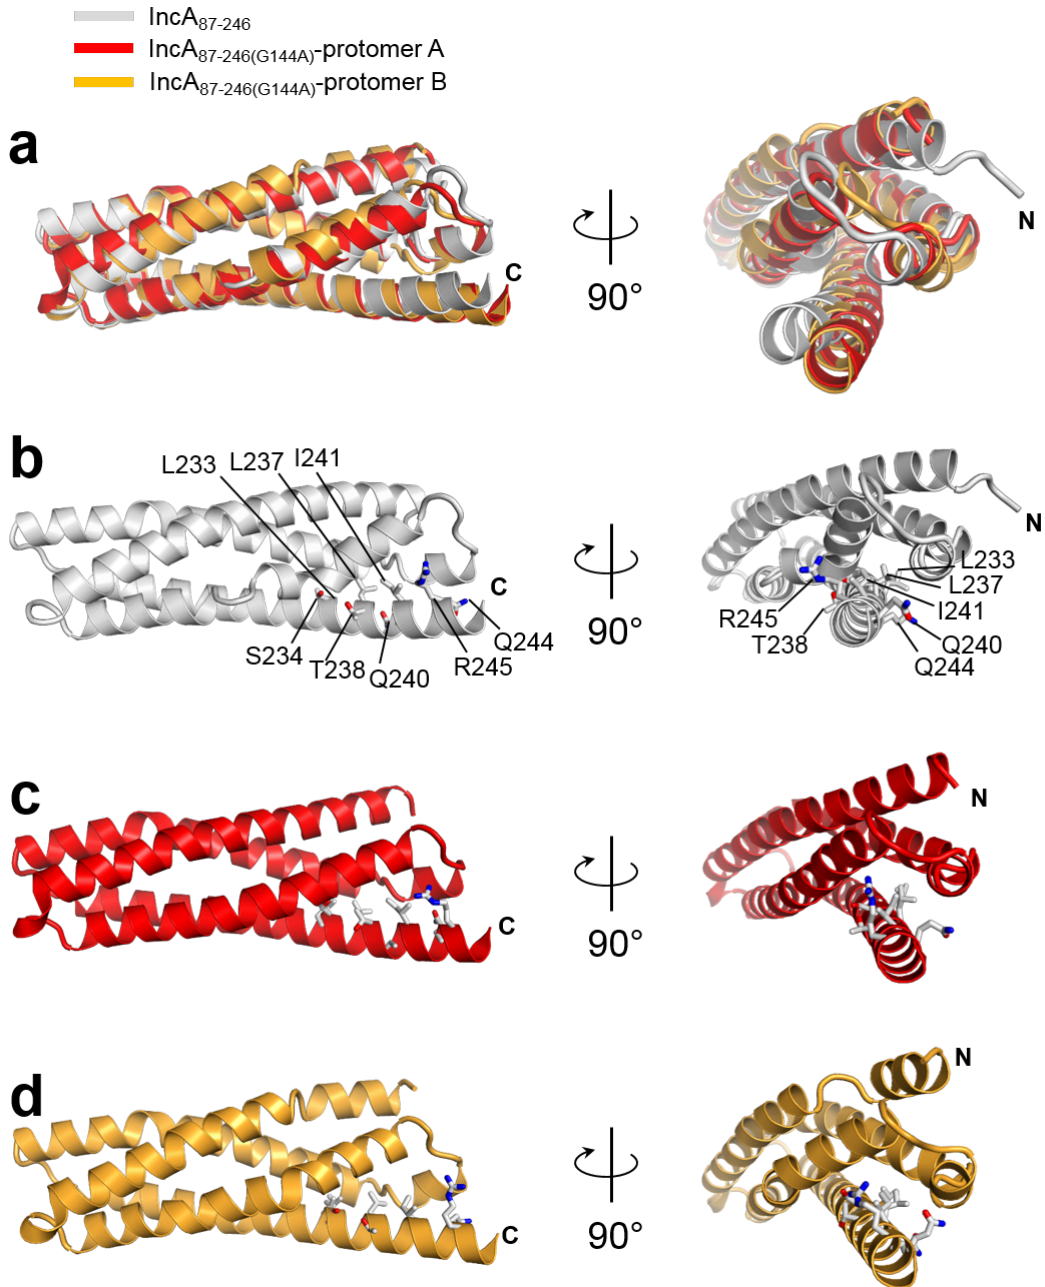

**Supplementary Figure 8. Superimposition shows how the eight residues mutated in IncA<sub>87-246(polyA)</sub> are oriented with respect to IncA<sub>87-246(G144A)</sub> protomers, aligned against IncA<sub>87-246</sub>. A structural alignment of IncA<sub>87-246</sub>, IncA<sub>87-246(G144A)</sub>-protomer A, and IncA<sub>87-246(G144A)</sub>-protomer B is in panel (a). The three individual IncA constructs are shown in panels (b), (c), and (d), respectively. The eight residues mutated to alanine in IncA<sub>87-246(polyA)</sub> are labeled in panel (b) and also shown as sticks in panels (c) and (d).**

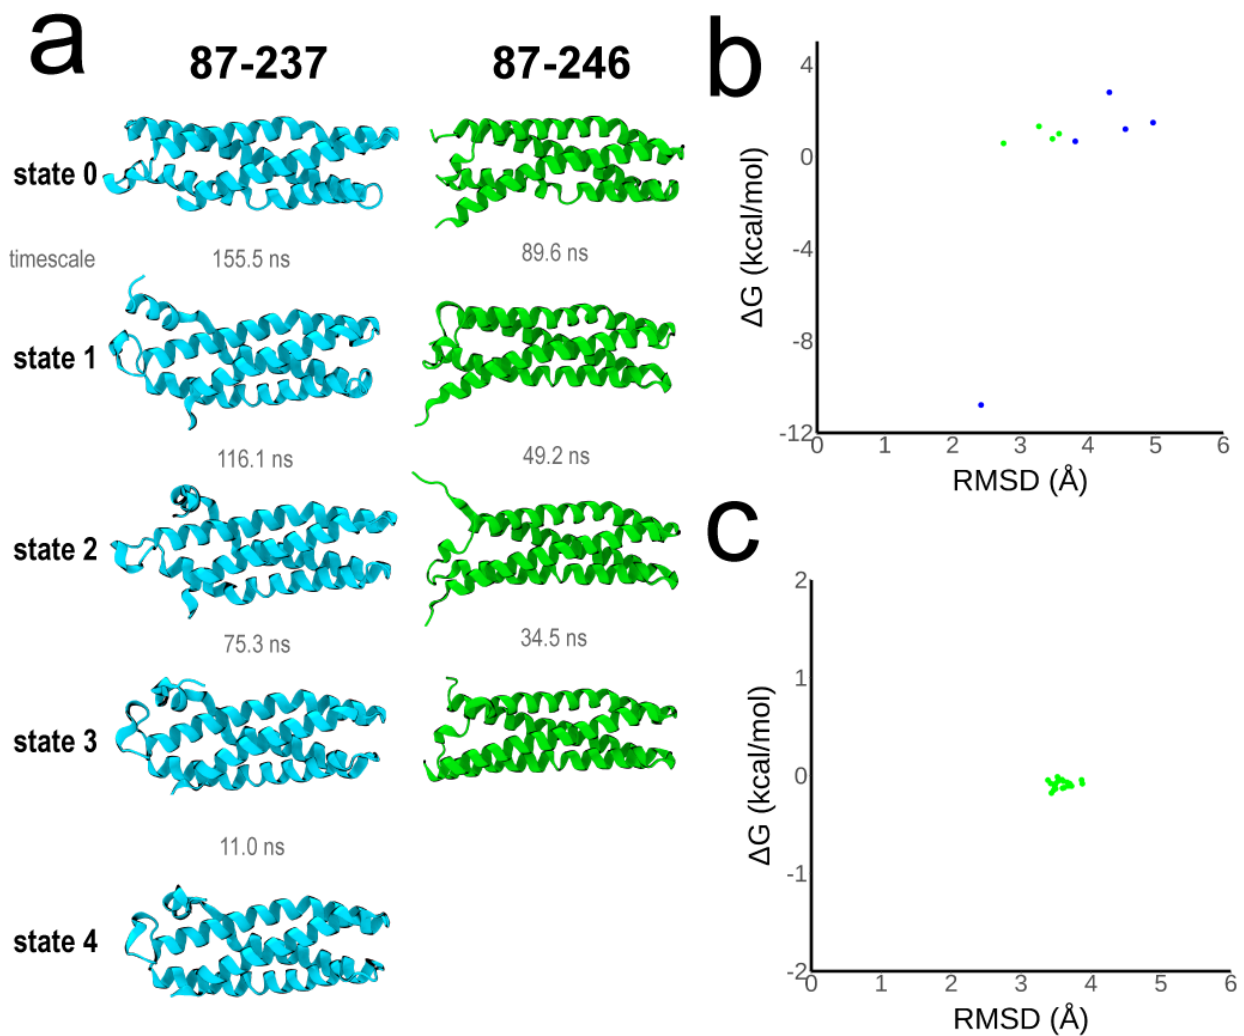

**Supplementary Figure 9. Markov State Models (MSM) of Inca<sub>87-246</sub> and Inca<sub>87-237</sub>** (a) Side-by-side comparison of the Markov states of Inca<sub>87-246</sub> (green) and Inca<sub>87-237</sub> (blue). These models were constructed from k=6 clustered input trajectories, loops were not considered for the MSM analysis. Pictures are in order the top scoring models of Inca<sub>87-237</sub>. (b) Free energy landscape of the Markov states shown in panel a (colored accordingly). (c) Free energy landscape of the highest scoring Inca<sub>87-246</sub> MSM, constructed from a k=500 clustered input trajectory.

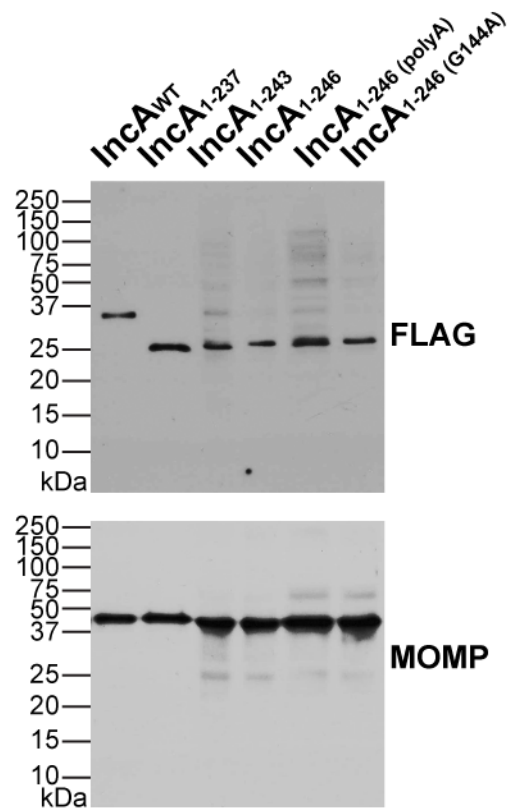

**Supplementary Figure 10. Analysis of IncA<sub>mutant</sub> expression.** Uncropped Western blots from Figure 4a. HeLa cells were infected with the indicated IncA<sub>mutant</sub>-FLAG complemented IncA KO strains for 24 h and then lysed in sample buffer. Samples analyzed by Western blot using anti-FLAG and anti-*C. trachomatis* MOMP primary antibodies. Source data are provided as a Source Data file.

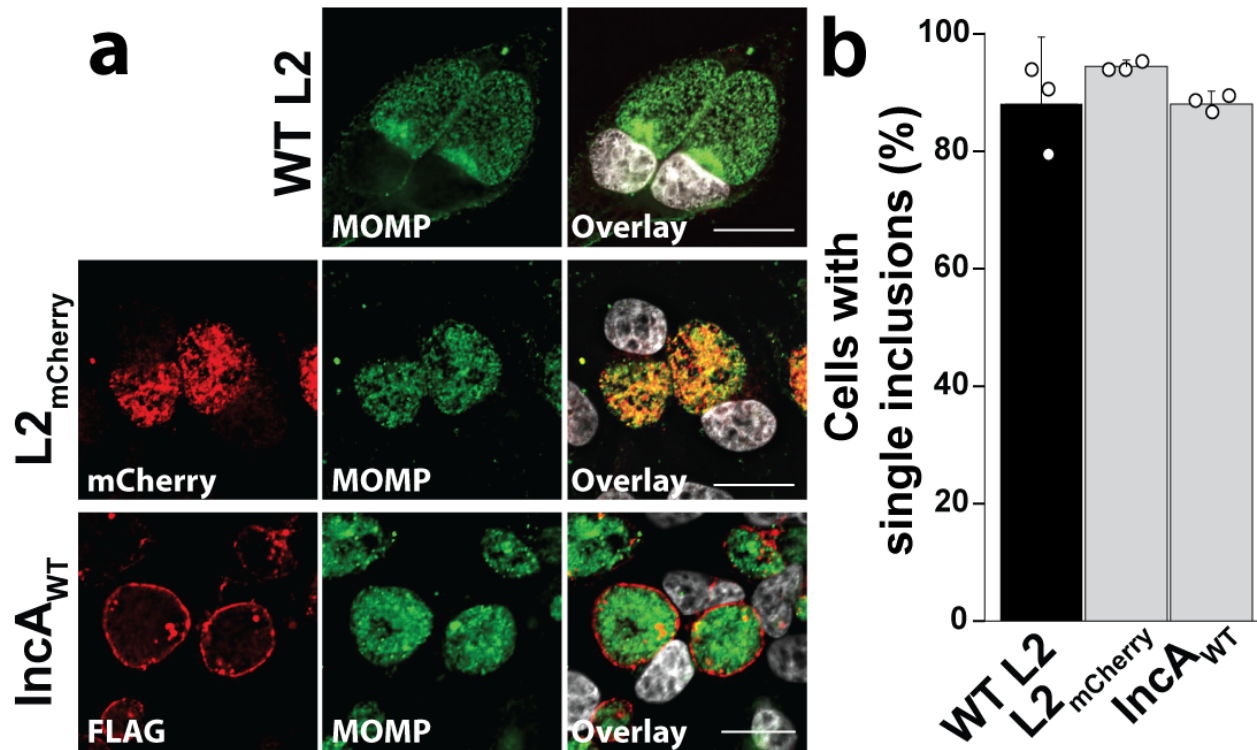

**Supplementary Figure 11. WT *Chlamydia*, *Chlamydia* KO-complemented with Inca<sub>WT</sub>-FLAG, and *Chlamydia* expressing mCherry (L2<sub>mCherry</sub>) undergo comparable levels of homotypic fusion.** (a) Immunofluorescence microscopy analysis of HeLa cells infected with the indicated wild type Inca strain (WT L2 and L2<sub>mCherry</sub>) or Inca<sub>WT</sub>-FLAG complemented Inca KO strain at 24hpi. Bacteria were labeled with anti-MOMP (green) antibody. DNA was stained with Hoechst (white). L2<sub>mCherry</sub> is indicated in red (middle panel). The expression of Inca<sub>WT</sub>-FLAG on the inclusion was revealed with anti-FLAG antibody (red, lower panel). The ring-like FLAG staining shows that Inca<sub>WT</sub>-FLAG is secreted on the inclusion membrane. Scale bar = 20µm. Images are representative of three independent experiments. (b) Quantification of homotypic fusion for wild type *Chlamydia* (WT L2), L2<sub>mCherry</sub>, or Inca<sub>WT</sub>-FLAG complemented Inca KO strain. The graph displays the means of three independent experiments ± the standard deviation. There is no statistical significance between strains (two-tailed student t-test). Source data are provided as a Source Data file.

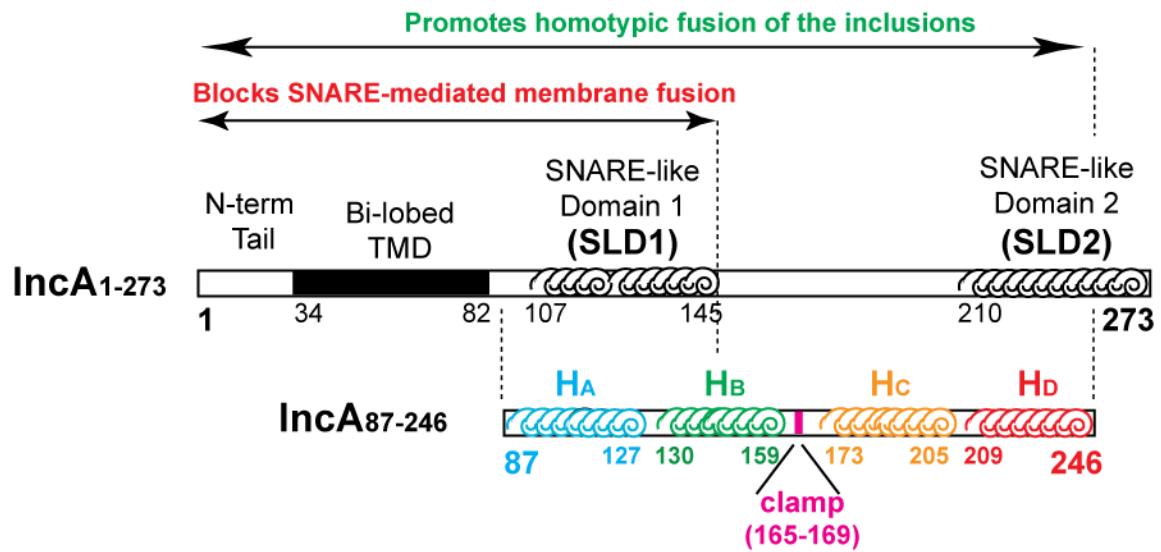

Supplementary Figure 12. Schematic diagram showing how the  $\alpha$ -helices observed in the crystal structure of IncA correspond to the SNARE-like Domains 1 and 2 (SLD1 and SLD2) previously described for IncA<sup>2,3</sup>.

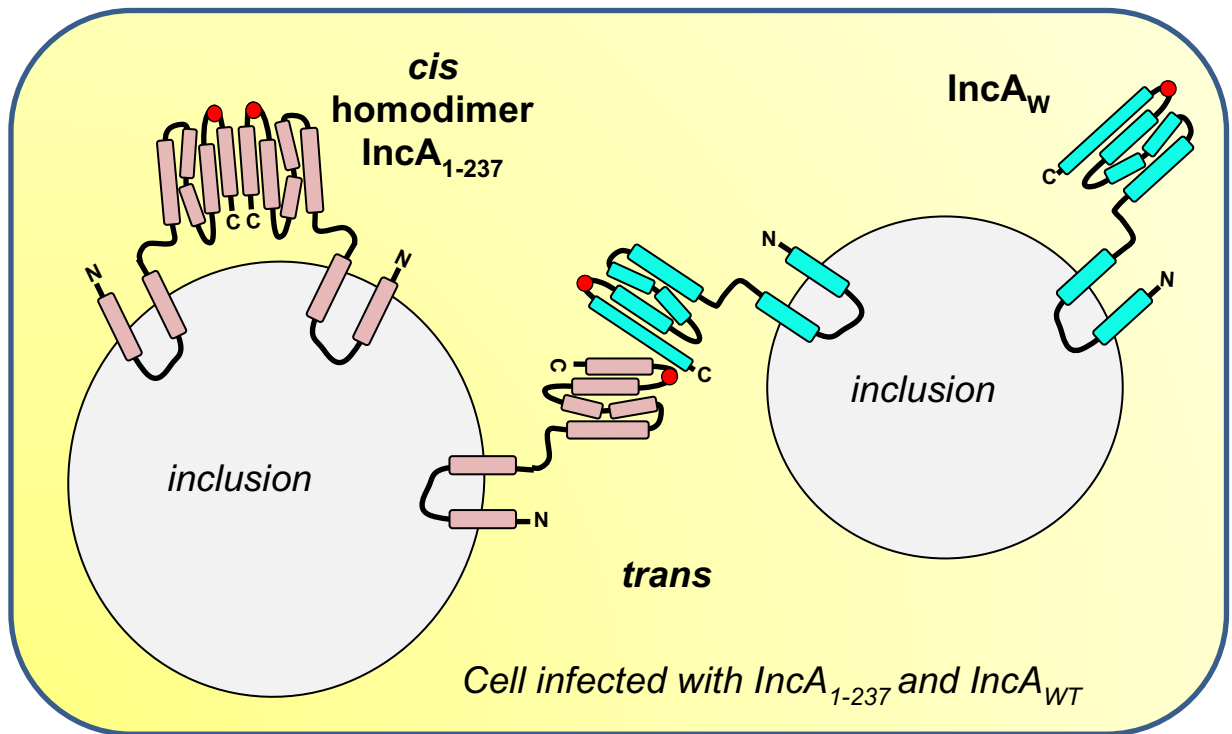

**Supplementary Figure 13. Hypothetical mechanism of fusion for cells infected by *Chlamydia* that expresses Inca<sub>1-237</sub> (inclusion #1) and Inca<sub>WT</sub> (inclusion #2).** The shorter Inca<sub>1-237</sub> is trapped in a high order oligomeric conformation (cis-homodimer in the illustration), which is incompetent for membrane fusion, whereas Inca<sub>WT</sub> is monomeric and competent for fusion. Complete rescue of Inca<sub>1-237</sub> loss of function is achieved by the formation of trans-heterodimers with Inca<sub>WT</sub>.



**Supplementary Table 1. Biophysical parameters measured using AUC-SV**

|                                                                   | <b>IncA<sub>87-246</sub></b> | <b>IncA<sub>87-246</sub>(G144A)</b> | <b>IncA<sub>87-246</sub>(polyA)</b> |
|-------------------------------------------------------------------|------------------------------|-------------------------------------|-------------------------------------|
| Protein Concentration (mg ml <sup>-1</sup> )                      | 3.0                          | 1.5                                 | 3.0                                 |
| <i>Apparent</i> Sedimentation Coef., <i>s</i> (S)                 | 1.240                        | 1.178                               | 2.131                               |
| <i>Absolute</i> Sedimentation Coef., <i>s</i> <sub>20,w</sub> (S) | 1.289                        | 1.225                               | 2.257                               |
| Estimated / Theoretical M.W. (kDa)                                | 19.3 / 19.7                  | 19.3 / 19.7                         | 58.4 / 19.3                         |
| Frictional Ratio, <i>f/f</i> <sub>0</sub>                         | 1.971                        | 2.076                               | 2.367                               |

**Supplementary Table 2. Interfaces and contacts made by IncA H<sub>clamp</sub> residues with  $\alpha$ -helices H<sub>A</sub>, H<sub>B</sub>'', H<sub>C</sub>, and H<sub>D</sub>**

|                                                  | H <sub>clamp</sub> :H <sub>A</sub> | H <sub>clamp</sub> :H <sub>B</sub> '' | H <sub>clamp</sub> :H <sub>C</sub> | H <sub>clamp</sub> :H <sub>D</sub> |
|--------------------------------------------------|------------------------------------|---------------------------------------|------------------------------------|------------------------------------|
| Interface area in (Å <sup>2</sup> ) *            | 236.3                              | 295.3                                 | 112.5                              | 218.8                              |
| Solvation Free Energy ( $\Delta$ iG) (kcal/M) ** | -3.3                               | -4.3                                  | -1.2                               | -4.8                               |
| No. of hydrogen bonds ***                        | 1                                  | 2                                     | 4                                  | 1                                  |
| No. of non-bonded contacts ***                   | 18                                 | 40                                    | 16                                 | 20                                 |

\* Interface area (Å<sup>2</sup>) calculated by Pisa<sup>4</sup> as the difference in total accessible surface areas of isolated and interfacing structures divided by two.

\*\* Solvation Free Energy ( $\Delta$ iG) gain upon formation of the interface (in kcal M<sup>-1</sup>). Negative  $\Delta$ iG in Pisa<sup>4</sup> corresponds to hydrophobic interfaces, or positive protein affinity.

\*\*\* Number of hydrogen bonds, nonbonded contacts and salt bridges calculated by PDBSum<sup>5</sup>.

**Supplementary Table 3. Recombinant *Chlamydia* strains used in this study**

| <b>Name</b>                                      | <b>Genetic background</b> | <b>Plasmid</b>                                              | <b>Antibiotic resistance</b>   | <b>Ref</b> |
|--------------------------------------------------|---------------------------|-------------------------------------------------------------|--------------------------------|------------|
| L2 <sub>mCherry</sub>                            | L2 434/Bu                 | pBomb4-MCI                                                  | penicillin                     | 6          |
| IncA <sup>KO</sup><br>(CT119::bla)               | L2 434/Bu                 | pACT-IncA                                                   | penicillin                     | 7          |
| IncA <sub>WT</sub> -FLAG                         | CT119::bla                | pBomb3-Tet-IncA <sub>1-273</sub> -FLAG                      | penicillin and chloramphenicol | 7          |
| IncA <sub>1-237</sub> -FLAG                      | CT119::bla                | pBomb3-Tet-IncA <sub>1-237</sub> -FLAG                      | penicillin and chloramphenicol | 7          |
| IncA <sub>1-243</sub> -FLAG                      | CT119::bla                | pBomb3-Tet-IncA <sub>1-243</sub> -FLAG                      | penicillin and chloramphenicol | here       |
| IncA <sub>1-246</sub> -FLAG                      | CT119::bla                | pBomb3-Tet-IncA <sub>1-246</sub> -FLAG                      | penicillin and chloramphenicol | here       |
| IncA <sub>1-246</sub> (polyA) <sup>-</sup> -FLAG | CT119::bla                | pBomb3-Tet-IncA <sub>1-246</sub> (polyA) <sup>-</sup> -FLAG | penicillin and chloramphenicol | here       |
| IncA <sub>1-246</sub> (G144A) <sup>-</sup> -FLAG | CT119::bla                | pBomb3-Tet-IncA <sub>1-246</sub> (G144A) <sup>-</sup> -FLAG | penicillin and chloramphenicol | here       |

**Supplementary Table 4. Primers used in this study**

| <b>Primer</b> | <b>Sequence</b>                                                      |
|---------------|----------------------------------------------------------------------|
| FO515         | CATGCCATGGCCACCGCTAATCTACATCTATAC                                    |
| FO516         | CCGCTCGAGAAGAGTTTTAGAAAGTTG                                          |
| FO818         | GAATTCGCGGCCGCATGGCAACGCCTACTCTAATCG                                 |
| FO1023        | CAATTCGCGGCCGCATGGCAACGCCTACTCTAATCG                                 |
| FO1024        | GAATTCGTCGACCTACTTGTTCGTCATCGTCTTTGTAGTCCTCTTTTCG<br>TTGTAATGCAATTTG |
| FO1067        | GATTTTTATTCTTGTTTGCAAGCATTTAGAGATAACTATAAAGGTTTTG                    |
| FO1068        | CCTTTATAGTTATCTCTAAATGCTTGCAAACAAGAATAAAAATCTTGA                     |
| FO1116        | GATTTCCATGGCCACCGCTAATCTACATCTATAACCAGG                              |
| FO1143        | GAATTCGTCGACCTACTTGTTCGTCATCGTCTTTGTAGTCTAATGCAAT<br>TTGACTGG        |
| FO1184        | GAATTCGTCGACCTACTTGTTCGTCATCGTCTTTGTAGTCTTTGGCCG<br>CTAATGCCGC       |
| FO1185        | GAATTCCTCGAGTTTGGCCGCTAATGC                                          |

**Supplementary Table 5. Plasmids used in this study**

| <b>Plasmid</b> | <b>Plasmid Name</b>                                     |
|----------------|---------------------------------------------------------|
| FD578          | pET28a IncA <sub>87-246</sub> -His <sub>6x</sub>        |
| FD915          | pET28a IncA <sub>87-246(G144A)</sub> -His <sub>6x</sub> |
| FD923          | pBOMB3                                                  |
| FD929          | pBOMB3-Tet                                              |
| FD930          | pBOMB3-Tet IncA <sub>1-246</sub> -FLAG                  |
| FD944          | pBOMB3-Tet IncA <sub>1-243</sub> -FLAG                  |
| FD945          | pBOMB3-Tet IncA <sub>1-246(G144A)</sub> -FLAG           |
| FD948          | pBOMB3-Tet IncA <sub>1-246(polyA)</sub> -FLAG           |
| FD985          | pET28a IncA <sub>87-246(polyA)</sub> -His <sub>6x</sub> |

## SUPPLEMENTARY REFERENCES

1. Emsley P, Cowtan K. Coot: model-building tools for molecular graphics. *Acta Crystallogr D Biol Crystallogr* **60**, 2126-2132 (2004).
2. Paumet F, *et al.* Intracellular bacteria encode inhibitory SNARE-like proteins. *PLoS One* **4**, e7375 (2009).
3. Ronzone E, Paumet F. Two coiled coil domains of *Chlamydia trachomatis* IncA affect membrane fusion events during infection. *PLoS One* **8**, e69769 (2013).
4. Krissinel E, Henrick K. Inference of macromolecular assemblies from crystalline state. *J Mol Biol* **372**, 774-797 (2018).
5. Laskowski R, Jabłońska J, Pravda L, Vařeková R, Thornton J. PDBsum: Structural summaries of PDB entries. *Protein Sci* **27**, 129-134 (2018).
6. Bauler L, Hackstadt T. Expression and targeting of secreted proteins from *Chlamydia trachomatis*. *J Bacteriol* **196**, 1325-1334 (2014).
7. Weber M, *et al.* A Functional Core of IncA Is Required for *Chlamydia trachomatis* Inclusion Fusion. *J Bacteriol* **198**, 1347-1355 (2016).
