# Supplementary material for: Structural basis for the homotypic fusion of chlamydial inclusions by the SNARE-like protein IncA
Source: PubMed Central journal article supplement (PMC6588587; doi:10.1038/s41467-019-10806-9), 2019-06-21
Supplement: 41467_2019_10806_MOESM2_ESM.pdf [file 41467_2019_10806_MOESM2_ESM.pdf]

## **Description of Additional Supplementary Files**

File Name: Supplementary Movie 1

Description: ("lc\_comp\_final.mp4", resolution: 2700x3000): Individual composition of the IncA87-246 trajectory, shown from same two angles as above.

File Name: Supplementary Movie 2

Description: ("sc\_comp\_final.mp4", resolution: 2700x3000): individual composition of the IncA87-237 trajectory, shown from same two angles as above.

File Name: Supplementary Movie 3

Description: ("all3\_comp\_final.mp4", resolution: 2650x882): Composition showing side-by-side comparison of all three IncA simulations performed: 87-246 (green), 87-237 (blue), G144A (orange). Each trajectory is represented via two viewing angles.

File Name: Supplementary Movie 4

Description: ("g1\_comp\_final.mp4", resolution: 2700x3000): individual composition of the IncA87-246(G144A) trajectory, shown from same two angles as above.
